# Supplementary material for: Survey of women’s report for 33 maternal and newborn indicators: EN-BIRTH multi-country validation study
Source: PubMed Central journal article supplement (PMC7995710; doi:10.1186/s12884-020-03425-6), 2021-03-26
Supplement: 12884_2020_3425_MOESM3_ESM.pdf [file 12884_2020_3425_MOESM3_ESM.pdf]

Every Newborn BIRTH multi-country validation study: informing measurement of coverage and quality of maternal and newborn care

## Survey of women's report for 33 maternal & newborn indicators: EN-BIRTH multi-country validation study

Additional File 3: Definitions and formulas for validation metrics

Table 1. Table of definitions of validation metrics (Adapted from Day et al [1] and Munos et al [2])

| TERM                                                                | DEFINITION                                                                                                                                                                                                                 | FORMULA*                                                                                    |
|---------------------------------------------------------------------|----------------------------------------------------------------------------------------------------------------------------------------------------------------------------------------------------------------------------|---------------------------------------------------------------------------------------------|
| <b>SENSITIVITY (SE)</b>                                             | The proportion of individuals who truly received an intervention who were classified as having received the intervention by survey questions.                                                                              | $\frac{a}{a + c}$ $\frac{TP}{TP + FN}$                                                      |
| <b>SPECIFICITY (SP)</b>                                             | The proportion of individuals who truly did not receive an intervention who were classified as not having received the intervention by survey questions.                                                                   | $\frac{d}{b + d}$ $\frac{TN}{FP + TN}$                                                      |
| <b>PERCENT AGREEMENT (ACCURACY)</b>                                 | The proportion of individuals surveyed who were correctly classified as having received or not having received the intervention.                                                                                           | $\frac{a + d}{n}$ $\frac{TP + TN}{n}$                                                       |
| <b>VALIDITY RATIO</b>                                               | The population-level validity of the measure using survey coverage and observed coverage.                                                                                                                                  | $\frac{\text{Survey coverage}}{\text{Observed coverage}}$                                   |
| <b>POSITIVE PREDICTIVE VALUE (PPV)</b>                              | The probability that an intervention reported as received has been observed as received                                                                                                                                    | $\frac{a}{a + b}$ $\frac{TP}{TP + FP}$                                                      |
| <b>NEGATIVE PREDICTIVE VALUE (NPV)</b>                              | The probability that an intervention not reported had been observed as not received                                                                                                                                        | $\frac{d}{c + d}$ $\frac{TN}{FN + TN}$                                                      |
| <b>AREA UNDER THE RECEIVER OPERATING CHARACTERISTIC CURVE (AUC)</b> | The probability that a test will correctly classify a randomly selected set of one positive observation and one negative observation.                                                                                      | Calculated as the area under the curve of sensitivity plotted against (1 – specificity)     |
| <b>INFLATION FACTOR (IF)</b>                                        | The degree to which the indicator would be over or under-estimated by women's self-report using a ratio of the estimated survey-based coverage accounting for sensitivity and specificity to its true (observed) coverage. | $\frac{\text{Observed coverage} \times (SE + SP - 1) + (1 - SP)}{\text{Observed coverage}}$ |

\*Variables defined in Table 2

Table 2. Two-by-two validation table

|                       |          | GOLD STANDARD            |                          |              |
|-----------------------|----------|--------------------------|--------------------------|--------------|
|                       |          | Positive                 | Negative                 | Total        |
| SURVEY<br>MEASUREMENT | Positive | a<br>True Positive (TP)  | b<br>False Positive (FP) | a+b<br>TP+FP |
|                       | Negative | c<br>False Negative (FN) | d<br>True Negative (TN)  | c+d<br>FN+TN |
|                       | Total    | a+c<br>TP+TN             | b+d<br>FP+FN             | n            |

1. Day LT, Ruysen H, Gordeev VS, Gore-Langton GR, Boggs D, Cousens S, et al. "Every Newborn-BIRTH" protocol: observational study validating indicators for coverage and quality of maternal and newborn health care in Bangladesh, Nepal and Tanzania. *J Glob Health*. 2019;9:010902.
2. Munos MK, Blanc AK, Carter ED, Eisele TP, Gesuale S, Katz J, et al. Validation studies for population-based intervention coverage indicators: design, analysis, and interpretation. *J Glob Health*. 2018;8:020804.
